## Correction: The attenuated hepatocellular carcinoma-specific *Listeria* vaccine Lmdd-MPFG prevents tumor occurrence through immune regulation of dendritic cells

Xin Wan<sup>1</sup>, Ci Cheng<sup>1</sup>, Zhe Lin<sup>1</sup>, Runqiu Jiang<sup>2</sup>, Wei Zhao<sup>1</sup>, Xin Yan<sup>1</sup>, Junwei Tang<sup>2</sup>, Kun Yao<sup>1</sup>, Beicheng Sun<sup>2</sup> and Yun Chen<sup>1</sup>

<sup>1</sup> Department of Microbiology and Immunology, Nanjing Medical University, Nanjing, Jiangsu Province, China

<sup>2</sup> Liver Transplantation Center, The First Affiliated Hospital of Nanjing Medical University, Nanjing, Jiangsu Province, China

**Published:**

**Copyright:** Wan et al. This is an open-access article distributed under the terms of the Creative Commons Attribution License 3.0 (CC BY 3.0), which permits unrestricted use, distribution, and reproduction in any medium, provided the original author and source are credited.

**This article has been corrected:** In Figure 2, the WB results of GAPDH in Figure 2E is an accidental duplicate of the GAPDH band in 2C. The corrected Figure 2, produced using the original data, is shown below. The authors declare that these corrections do not change the results or conclusions of this paper.

Original article: Oncotarget. 2015; 6:8822–8838. <https://doi.org/10.18632/oncotarget.3558>

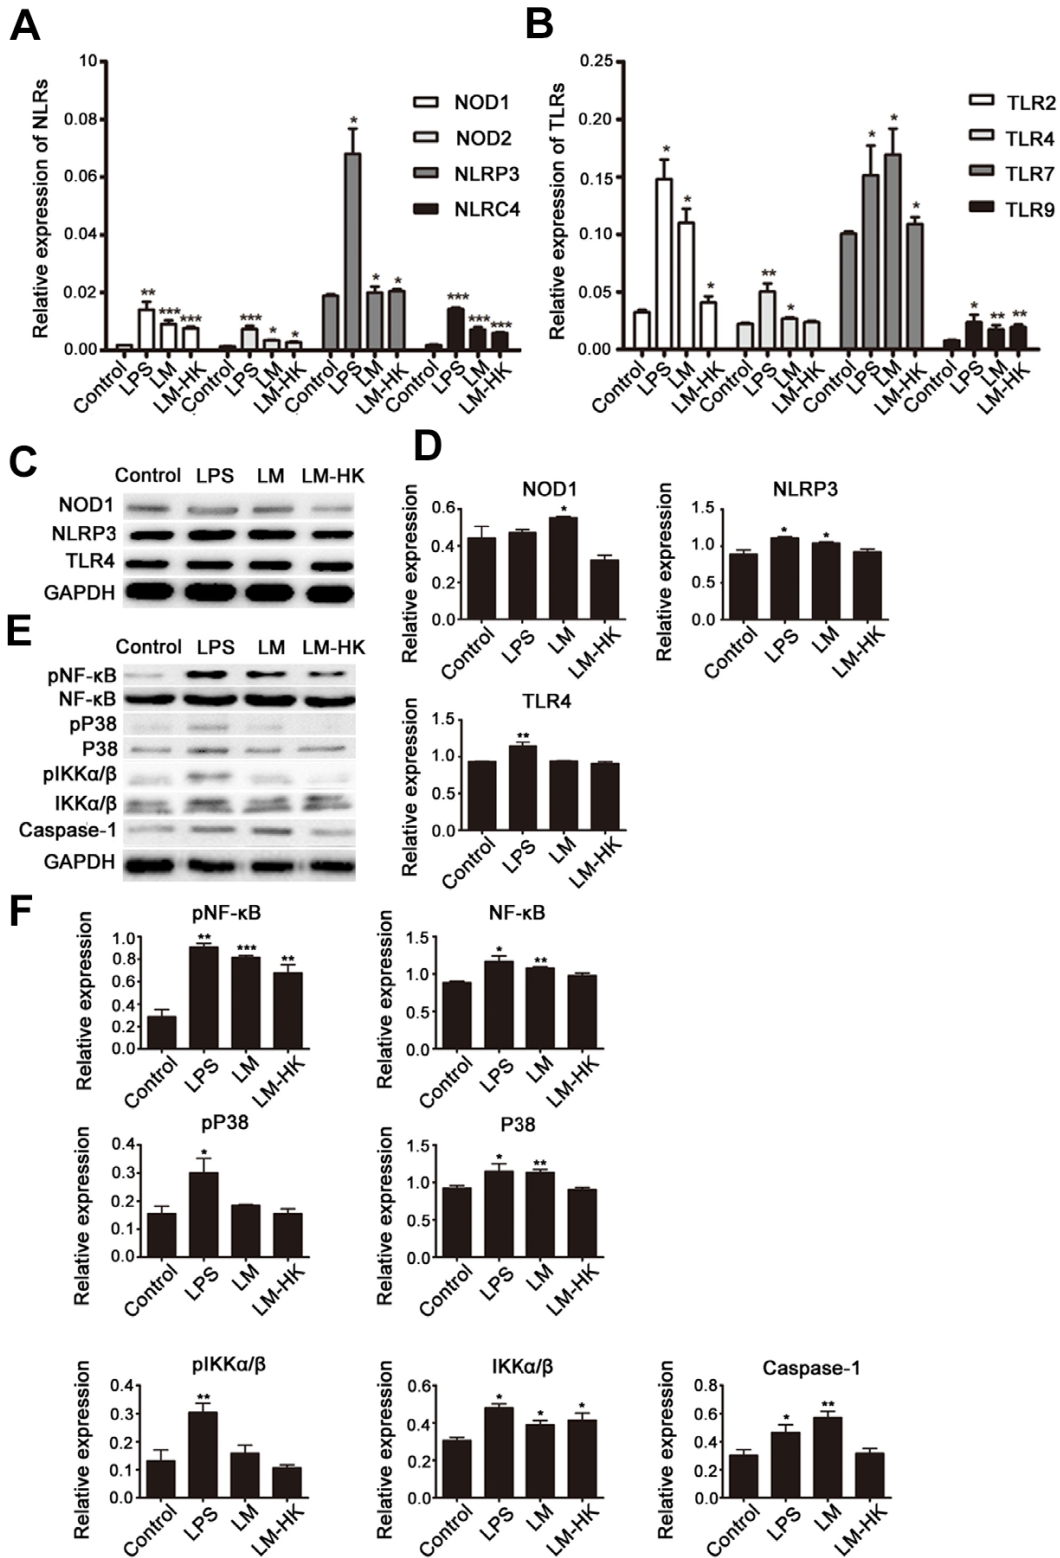

**Figure 2: TLRs and NLRs in LM-promoted dendritic maturation.** BMDCs were collected for 24 h treatment (control, LPS, LM, and LM-HK). Messenger RNA levels of NLRs (A) and TLRs (B) were detected in each group by quantitative real-time PCR. Protein extracts were prepared and relative NLR and TLR protein levels were detected by western blot assays (C). Densitometry values relative to internal controls are displayed in the histograms (D). Activation of several signaling pathways was also analyzed by western blot (E). Summary statistics are depicted in the histogram (F). All data are presented as the mean  $\pm$  SEM (\* $p$  < 0.05, \*\* $p$  < 0.01, \*\*\* $p$  < 0.001).
